# Supplementary material
Source: publisher figshare collection journal article supplement (https://plos.figshare.com/articles/dataset/_/6861689)
Supplement: Supplementary file [file 1]

| School | Round | Unique participants | Male participants | Female participants | Total contacts |
|--------|-------|---------------------|-------------------|---------------------|----------------|
| 1      | 1     | 61                  | 26                | 35                  | 352            |
|        | 2     | 83                  | 30                | 53                  | 470            |
|        | 3     | 92                  | 36                | 56                  | 525            |
|        | 4     | 70                  | 28                | 42                  | 387            |
| 2      | 1     | 134                 | 57                | 77                  | 786            |
|        | 2     | 121                 | 52                | 69                  | 699            |
|        | 3     | 141                 | 55                | 86                  | 826            |
|        | 4     | 85                  | 33                | 52                  | 505            |
| 3      | 1     | 91                  | 91                | 0                   | 525            |
|        | 2     | 67                  | 67                | 0                   | 377            |
|        | 3     | 67                  | 67                | 0                   | 381            |
|        | 4     | 143                 | 143               | 0                   | 794            |
| 4      | 1     | 25                  | 11                | 14                  | 142            |
|        | 2     | 26                  | 9                 | 17                  | 144            |
|        | 3     | 25                  | 7                 | 18                  | 138            |
|        | 4     | 21                  | 7                 | 14                  | 122            |
